# Supplementary material
Source: publisher site journal article supplement (http://kjim.org/upload/media/kjim-2020-142-suppl1.pdf)
Supplement: Supplementary file 1 [file kjim-2020-142-suppl1.pdf]

**Supplementary Table 1. ICD-9-CM codes used for identifying the types of organ failure**

| Types of organ failure | ICD-9 codes                                              |
|------------------------|----------------------------------------------------------|
| Respiratory            | 518.81, 518.82, 518.85, 786.09, 799.1, 96.7              |
| Cardiovascular         | 458.0, 785.5, 785.51, 785.59, 458.0, 458.8, 458.9, 796.3 |
| Renal                  | 584, 580, 585, 39.95                                     |
| Hepatic                | 570, 572.2, 573.3                                        |
| Hematologic            | 286.2, 286.6, 286.9, 287.3-5                             |
| Metabolic              | 276.2                                                    |
| Neurologic             | 293, 348.1, 348.3, 780.01, 780.09, 89.14                 |

ICD-9-CM, International Classification of Diseases, Ninth Revision, Clinical Modification.
